# Supplementary material
Source: PubMed Central journal article supplement (PMC4505667)
Supplement: JVI.00438-15_zjv999090573so1.pdf [file JVI.00438-15_zjv999090573so1.pdf]

## Supplementary Figure 1

### Gating strategy of CD4 T cell sorting

A doublet exclusion gate was first used, followed by a lymphocyte gate and a viability gate. Live single lymphocytes were then separated into CD4 and CD8 cell gates and sorted according to CD107a<sup>+</sup> IFN $\gamma$ <sup>+</sup> and CD107a<sup>-</sup> IFN $\gamma$ <sup>+</sup>.

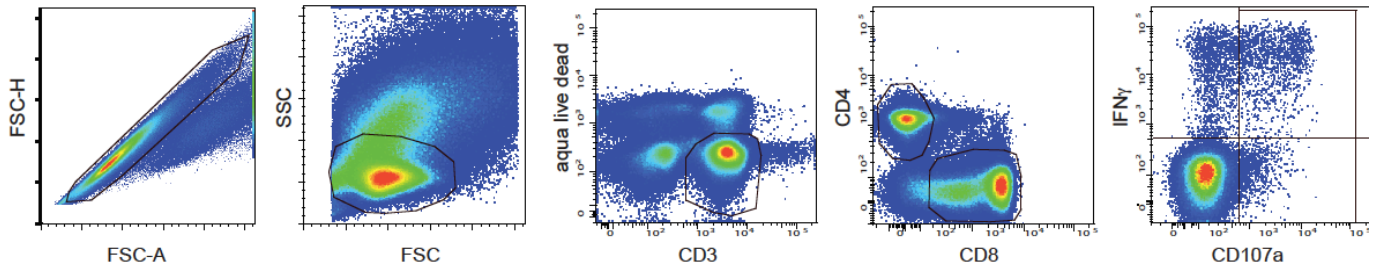

# Supplementary Table 1

## Fluidigm Gene Panel

The panel of genes used during the Biomark Fluidigm analysis is listed in alphabetical order. The gene, description and probe sequence are listed for all 96 genes utilized in the panel.

| Gene     | Description                                                                      | Gene ID  | Probe Seq                  |
|----------|----------------------------------------------------------------------------------|----------|----------------------------|
| ACTB     | actin, beta                                                                      | 60       | CCCTTTGCCGATCCGCCGCGCCGTC  |
| APOBEC3G | apolipoprotein B mRNA editing enzyme, catalytic polypeptide-like 3G              | 60489    | TATGCAACCAGGCTCCACATAAACA  |
| B3GAT1   | beta-1,3-glucuronyltransferase 1 (glucuronosyltransferase P); CD57               | 27087    | TCAGGATGACGAGGCCTCCTCA     |
| BCL2     | B-cell CLL/lymphoma 2                                                            | 596      | AACGGAGGCTGGGATGCCTTTGTGG  |
| BCLX     | BCL2-like 1                                                                      | 598      | GAAACGGCGCTGGGATGCTTTGTGG  |
| BCL6     | B-cell CLL/lymphoma 6                                                            | 604      | GAAACCTTACCATTGTGAGAAGTGT  |
| CCL3     | chemokine (C-C motif) ligand 3                                                   | 619514   | CAAGCCCGGTGTCTATCTCTTAACC  |
| CCL4     | chemokine (C-C motif) ligand 4                                                   | 6351     | CTCAGCACCAAAATCCAAACCAAAA  |
| CCL5     | chemokine (C-C motif) ligand 5                                                   | 6352     | CCAAACCCAGCAGTGTCTTTGTCC   |
| CCR5     | chemokine (C-C motif) receptor 5                                                 | 735311   | GAGGCTCCCGAGCGGCAAGTTCAG   |
| CCR6     | chemokine (C-C motif) receptor 6                                                 | 574335   | AAAACATTTCCCGCAGACAGGATGA  |
| CCR7     | chemokine (C-C motif) receptor 7                                                 | 574231   | CTGGGCTACAGCGCCGCAAGTCC    |
| CD109    | CD109 molecule                                                                   | 135228   | CCCTTCTGGGAGCCTTGGTTGTGAC  |
| CD244    | CD244 molecule, natural killer cell receptor 2B4                                 | 51744    | GGGCAAAAGATGCCAGGATCAGCT   |
| CD27     | CD27 molecule                                                                    | 712693   | CGGCACCTGTAACCTGTGTCTTCA   |
| CD28     | CD28 molecule                                                                    | 940      | AGTAACAGGAAACAAGATTTGGTG   |
| CD28     | CD28 molecule                                                                    | 940      | TATATTTTTCTGGGTGAGGAGTAA   |
| CD3E     | CD3e molecule, epsilon (CD3-TCR complex)                                         | 699467   | CAGGCAAGGGGCAAAAACAAGGAG   |
| CD4      | CD4 molecule                                                                     | 713807   | CTCGTGGTGTGAGAGCCACTCAGT   |
| CD40LG   | CD40 ligand                                                                      | 574160   | AGAAGTTGGACAAGATGAAGATG    |
| CD5      | CD5 molecule                                                                     | 921      | AGCTGGTATGCCAGGATTTCCAGG   |
| CD69     | CD69 molecule                                                                    | 969      | AGTGCACAAGAAAATGATGCCACCA  |
| CD84     | CD84 molecule                                                                    | 8832     | GCTGATAAGTGGGGAAGCCAGCA    |
| CD8A     | CD8a molecule                                                                    | 925      | TTTACTGCAACCACAGGAACCGAAG  |
| CD8B     | CD8b molecule                                                                    | 928      | CAGCTGAGTGTGGTGTATTCCTCT   |
| CTLA4    | cytotoxic T-lymphocyte-associated protein 4                                      | 705673   | TGTAATTGATCCAGAACCGTGCCCA  |
| CXCR3    | chemokine (C-X-C motif) receptor 3                                               | 699438   | GCCGCCCTCTGGAAACTTCAGCT    |
| CXCR4    | chemokine (C-X-C motif) receptor 4                                               | 7852     | CATGGAGGGATCAGTATATACACT   |
| CXCR5    | chemokine (C-X-C motif) receptor 5                                               | 643      | AGAACCGAGGAACTCAGAGTCGGA   |
| EOMES    | eomesodermin                                                                     | 704711   | TACGAAACGAGGAGCGCATGTTT    |
| FASLG    | Fas ligand (TNF superfamily, member 6)                                           | 356      | GAAACAAATAGGCCACCCAGTCCA   |
| FOXP1    | forkhead box P1                                                                  | 27086    | CCATGCAAGCCGTGCATCCTGTAC   |
| FOXP3    | forkhead box P3                                                                  | 574303   | GCTCATCGCTGGGCCATCCTGGAG   |
| GAPDH    | glyceraldehyde-3-phosphate dehydrogenase                                         | 574353   | TCCAGGAGGAGATCCCTCCAAAT    |
| GATA3    | GATA binding protein 3                                                           | 2625     | CCCACCAAGGGAGCCAGTGTGCGG   |
| GNLY     | granulysin                                                                       | 10578    | TAAAGCCACCCAGAGAGTGTTCCT   |
| GUSB     | glucuronidase, beta                                                              | 2990     | GCTACTACTGAAGATGGTATCGC    |
| GZMA     | granzyme A (granzyme 1, cytotoxic T-lymphocyte-associated serine esterase 3)     | 705712   | TGTGTAATTCCTGAAGATGTCTGT   |
| GZMB     | granzyme B (granzyme 2, cytotoxic T-lymphocyte-associated serine esterase 1)     | 716518   | AGGACAGATGACGGGAGATCATCG   |
| GZMH     | granzyme H (cathepsin G-like 2, protein h-CCPX)                                  | 2999     | CCCTGGGGCTGGGACAGGAGGATC   |
| GZMK     | granzyme K (granzyme 3; tryptase II)                                             | 705477   | ATATATGTGCTGTTAAGCTCAAAAC  |
| GZMM     | granzyme M (lymphocyte met-ase 1)                                                | 3004     | GCCTGTGTCAGTAGGACGCTCCTTT  |
| HLA-DRB1 | major histocompatibility complex, class II, DR beta 1                            | 3123     | TGGGACACCCGACCCAGCTTCTCG   |
| ICAM1    | intercellular adhesion molecule 1                                                | 3383     | CCTCACCGGTGATCGACTCCAGAA   |
| ICOS     | inducible T-cell co-stimulator                                                   | 705788   | CATGAAAGTTTAAACAGGAGAAAT   |
| IFNG     | interferon, gamma                                                                | 574282   | AAAGCTGACCAATATTCTGGTAAT   |
| IFNGR1   | interferon gamma receptor 1                                                      | 3459     | TGGGCGCTCCTCAGTGCTCACGCC   |
| IL10     | interleukin 10                                                                   | 694931   | TTAGTAAGCTCCAAGAGAAAGGGCT  |
| IL12RB1  | interleukin 12 receptor, beta 1                                                  | 3594     | GAAAGAGCAGCCAAACCCAGCTGGAG |
| IL13     | interleukin 13                                                                   | 3596     | CAGAACCAGAAAGGCTCCGCTCTCCA |
| IL16     | interleukin 16                                                                   | 3603     | AGAGCCAGCCAGTGACCCAAACAT   |
| IL17A    | interleukin 17A                                                                  | 3605     | GAATCTCCACCAGCAATGAGGACCT  |
| IL2      | interleukin 2                                                                    | 708017   | AACTAAAGGGATCTGAACAACACT   |
| IL21     | interleukin 21                                                                   | 59067    | GAAACACAGACTAATCCCTCCCA    |
| IL22     | interleukin 22                                                                   | 50616    | GAAAAGCTTGGAGAGATGGAGAG    |
| IL23R    | interleukin 23 receptor                                                          | 149233   | AAACACCTGAAACAGTTCCECAGG   |
| IL2RA    | interleukin 2 receptor, alpha                                                    | 574300   | CAAGTAGCAGTGGCCGCTGTGTTT   |
| IL2RG    | interleukin 2 receptor, gamma                                                    | 3561     | GAAAGCACCCAGCTGATTTCTTCC   |
| IL4      | interleukin 4                                                                    | 3565     | TGCTGCTCCAAGAACCAACTGAG    |
| IL5      | interleukin 5 (colony-stimulating factor, eosinophil)                            | 710622   | TGCAAGGGGTACTGTGGAAGACT    |
| IL6R     | interleukin 6 receptor                                                           | 3570     | AGCCTCCAGTGAAGAAATCTTCTT   |
| IL7R     | interleukin 7 receptor                                                           | 699869   | ATCTGGAATTTGAAATATGTGGGG   |
| IL9      | interleukin 9                                                                    | 3578     | ACAACAAGTGTCCATATTTTCTGCT  |
| KLRB1    | killer cell lectin-like receptor subfamily B, member 1                           | 3820     | ATAAACAACAGAGAGACCGGGTCT   |
| KLRD1    | killer cell lectin-like receptor subfamily D, member 1                           | 3824     | CTGCACCTCCAGATATCTATTTCC   |
| KLRF1    | killer cell lectin-like receptor subfamily F, member 1                           | 51348    | GCAGACCAGACAGTACTATGCCAAT  |
| KLRG1    | killer cell lectin-like receptor subfamily G, member 1                           | 716727   | AGGAAAATCTTCTCTTCCAGGCG    |
| LAG3     | lymphocyte-activation gene 3                                                     | 713737   | CCTCACTGTTCTGGGTCTGGAGCC   |
| LAMP1    | lysosomal-associated membrane protein 1                                          | 697331   | TCTTCCAGTTCGGGATGAATGCAAG  |
| LAMP2    | lysosomal-associated membrane protein 2                                          | 695379   | GAGCACAATGAGTTCCTGTGTGT    |
| MAF      | v-maf musculoaponeurotic fibrosarcoma oncogene homolog (avian)                   | 4094     | TTCATAACTGAGCCCACTCGCAAG   |
| MK167    | antigen identified by monoclonal antibody Ki-67                                  | 697883   | ATACGCTGAACAGGAGCCAGCAGCT  |
| NKG2D    | NKG2D protein                                                                    | 574240   | ACAGCAAGAGGACCAAGGATTTACT  |
| PDCD1    | programmed cell death 1                                                          | 10013575 | AGAGCTCAGGGTGACAGAGAGGAG   |
| PRDM1    | PR domain containing 1, with ZNF domain                                          | 639      | ACAATGATGAATCTCACACAACAC   |
| PRF1     | perforin 1 (pore forming protein)                                                | 5551     | TGCCGCTTCTACAGTTTCCATGTGG  |
| RORC     | RAR-related orphan receptor C                                                    | 717052   | TCAGTATGAGAACACAATTTGAG    |
| RUNX3    | runt-related transcription factor 3                                              | 864      | AATCCAAGGCACCTCGAAGCTGAAC  |
| SELL     | selectin L; CD62L                                                                | 701419   | ATCCAATATGTCAAAAATGGACAG   |
| SLAMF1   | signaling lymphocytic activation molecule family member 1; CD150                 | 6504     | GAGGCTTTTATGAGCAGTCTCCACT  |
| SMAD3    | SMAD family member 3                                                             | 4088     | CGATGAGCAGGTTCTGCAAACTCT   |
| SMAD4    | SMAD family member 4                                                             | 4089     | TGGCTTCCACAAGTCAAGCTGCCAG  |
| SMAD7    | SMAD family member 7                                                             | 4092     | TCTCAACCAACTGCAGACTGTCCA   |
| STAT1    | signal transducer and activator of transcription 1, 91kDa                        | 693650   | GGCAACAGGTGGCAGGATGTCTCAG  |
| STAT3    | signal transducer and activator of transcription 3 (acute-phase response factor) | 6774     | CAAGCAGTTTCTTCCAGCAGGAT    |
| STAT4    | signal transducer and activator of transcription 4                               | 693854   | TCAAGAACTATTGTGGTTGAGCC    |
| STAT6    | signal transducer and activator of transcription 6, interleukin-4 induced        | 6778     | TGTCAGCCTTCCAGGAGGCTCAACT  |
| TBX21    | T-box 21                                                                         | 694044   | GCTACCAGAAATGCCGAGATTACTC  |
| TGFB1    | transforming growth factor, beta 1                                               | 574135   | AGTACAGGAAGTCTTGGCCCTGTGA  |
| TNF      | tumor necrosis factor                                                            | 715467   | CTCGACTTTGCCGAGTCTGGGCGAG  |
| TNFRSF4  | tumor necrosis factor receptor superfamily, member 4                             | 7293     | CCCTGGACCAACTGCACCTTGGCTG  |
| TNFRSF9  | tumor necrosis factor receptor superfamily, member 9                             | 708281   | TGTCGACCTGGCAACAACTGTTCT   |
| TNFSF10  | tumor necrosis factor (ligand) superfamily, member 10                            | 694451   | TTCAAGAAAAGCAACAAATACTCT   |
| TRIM5    | tripartite motif containing 5                                                    | 85363    | ATAAAAAGGACGGAGAACGTGACCT  |
| ZBTB7B   | zinc finger and BTB domain containing 7B                                         | 51043    | TGTTCCGATCCACAGGAAACGCAAG  |
